# Supplementary material for: Transgenerational Effects of Prenatal Endocrine Disruption on Reproductive and Sociosexual Behaviors in Sprague Dawley Male and Female Rats
Source: MDPI journal article supplement (doi:10.3390/toxics10020047), 2022-01-20
Supplement: s1 [file toxics-1517947-supplementary.xlsx]

## Sheet: Sheet1
Kermath et al., Supplemental Table S1. Table of Estimated Marginal Means and Standard Errors for F3 Partner Preference Scores
F3 Sex = MALE	UNT n = 5		DMSO n = 9		EB n = 7		A1221 n = 8
"Wire Zone"	Mean	± StdError	Mean	± StdError	Mean	± StdError	Mean	± StdError
Number of entries	1.8	3.44352	0.111111	2.56664	7.59068	3.17503	-1.61403	2.78572
Time (seconds)	-14.8267	26.6594	18.6037	19.8708	33.7122	24.1383	-11.8857	21.4662
Distance (meters)	-0.278867	0.500448	0.0992222	0.373012	1.16674	0.450907	-0.276266	0.402448
Average speed (meters/second)	0.000666667	0.00268372	-0.0012963	0.00200033	0.000402948	0.00247447	-0.000393434	0.00217106
Max time spent during a visit (seconds)	-3.56667	4.95211	6.52963	3.69108	0.296316	4.55464	3.54383	4.00358
Time active (seconds)	-14.06	9.97783	10.237	7.43704	15.1795	9.02812	-5.03316	8.03274
Time inactive (seconds)	-0.76	17.5025	8.35185	13.0456	27.8362	16.9524	-7.05621	14.1309
Grooming : number	0.133333	0.585673	0.814815	0.436534	0.381246	0.531781	-0.270266	0.471928
Grooming : time pressed (seconds)	-2.3	4.59411	7.31481	3.42424	1.20751	4.23591	-0.108185	3.71651
Rearing : number	-2.66667	2.49386	1.11111	1.85881	3.36087	2.26484	-1.28162	2.00963
Rearing : time pressed (seconds)	-6.54	6.57611	2.13333	4.90154	17.1526	6.06338	-1.97613	5.31991
Facial investigation : number	-1.86667	2.34816	0.518518	1.75022	-0.291215	2.1097	-1.36452	1.88693
Facial investigation : time pressed (seconds)	-6.54667	3.63637	-0.12963	2.71039	-2.56148	3.26302	-3.0882	2.92116
Plexiglass contact : number	-2.93333	1.75901	-0.148148	1.31109	2.66717	1.5824	0.154993	1.41397
Plexiglass contact : time pressed (seconds)	-7.38667	4.78004	-1.0963	3.56283	12.6009	4.40735	1.7524	3.86693
Total Distance (meters)	43.8425	2.50297	37.3132	1.8656	41.2103	2.2403	36.5238	2.00934
Total Mean Speed (meters/second)	0.0732667	0.00416198	0.0622963	0.00310215	0.0688369	0.00372914	0.0609827	0.00334209
F3 Sex = FEMALE	UNT n = 5		DMSO n = 10		EB n = 7		A1221 n = 7
"Wire Zone"	Mean	± StdError	Mean	± StdError	Mean	± StdError	Mean	± StdError
Number of entries	0.466667	2.87053	1.10911	2.06719	-4.42857	2.42604	-0.291786	2.49059
Time (seconds)	60.3933	36.2136	33.1145	25.8135	-41.2952	30.606	-21.792	30.9604
Distance (meters)	0.3738	0.35322	0.434436	0.253164	-0.298905	0.298525	-0.144982	0.304373
Average speed (meters/second)	-0.00386667	0.00293998	-0.00123279	0.00210119	0.003	0.00248474	0.00168501	0.00252304
Max time spent during a visit (seconds)	8.20667	7.18105	1.78889	5.13052	1.58095	6.0691	-10.5593	6.15964
Time active (seconds)	40.2133	16.3164	18.3275	11.6266	-21.2905	13.7899	-17.5519	13.9428
Time inactive (seconds)	20.16	22.8283	14.7664	16.295	-20.0238	19.2935	-0.866667	20.8393
Grooming : number	0.733333	1.69609	-1.38903	1.22143	0.333333	1.43346	0.6859	1.4716
Grooming : time pressed (seconds)	4.42	5.37357	-2.25569	3.86974	1.80952	4.5415	-2.51074	4.66235
Rearing : number	7.73333	3.8539	4.82373	2.76191	-6.38095	3.25714	-3.01109	3.32042
Rearing : time pressed (seconds)	40.46	13.8467	18.7709	9.8835	-16.8191	11.7026	-13.8986	11.8611
Facial investigation : number	-6.53333	3.02645	1.0622	2.16157	-6.52381	2.55782	-0.138482	2.59479
Facial investigation : time pressed (seconds)	-4.76667	5.33977	2.08268	3.8126	-7.3381	4.51293	-1.76731	4.57609
Plexiglass contact : number	6.33333	2.63061	3.75627	1.87501	-3.71429	2.22327	-0.411299	2.24878
Plexiglass contact : time pressed (seconds)	25.02	8.02773	12.7556	5.74249	-7.09048	6.78467	-3.96244	6.8981
Total Distance (meters)	29.5703	2.14141	32.1909	1.52308	31.8827	1.80982	32.7696	1.82502
Total Mean Speed (meters/second)	0.0493333	0.00356915	0.0537299	0.00253862	0.0531905	0.00301648	0.0547552	0.00304191
